# Supplementary material for: Gene stacking of multiple traits for high yield of fermentable sugars in plant biomass
Source: PubMed Central journal article supplement (PMC5759196; doi:10.1186/s13068-017-1007-6), 2018-01-09
Supplement: 13068_2017_1007_MOESM1_ESM.pdf [file 13068_2017_1007_MOESM1_ESM.pdf]

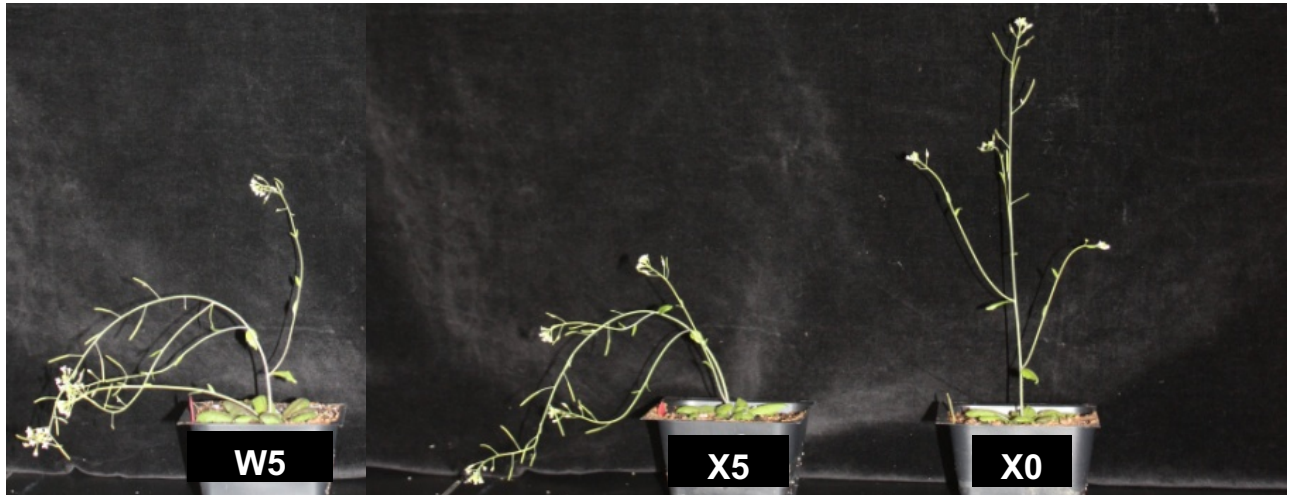

**Additional file 1: Phenotypes of W5 and X5 engineered lines.** . Pictures of engineered plants carrying the construct C5 in Col-0 wild type (W5) and *irx7/irx7* pVND7:IRX7 xylan-engineered (X5) backgrounds.
