# Supplementary material for: Gene stacking of multiple traits for high yield of fermentable sugars in plant biomass
Source: PubMed Central journal article supplement (PMC5759196; doi:10.1186/s13068-017-1007-6), 2018-01-09
Supplement: 13068_2017_1007_MOESM4_ESM.pdf [file 13068_2017_1007_MOESM4_ESM.pdf]

| construct name | Level          | Description                                                                                                                      |
|----------------|----------------|----------------------------------------------------------------------------------------------------------------------------------|
| <b>C1</b>      | <b>Level 2</b> | <b>{L_tOcs}{P_nos}{C_GALS1}{T_tG7}{P_MAS}{C_UGE2}{T_AtAct2}{P_AtAct2}{C_URGT1}{T_tNos}</b>                                       |
| pms6132        | Level 1        | {L_tOcs}{P_nos}{C_GALS1}{T_tG7}                                                                                                  |
| pms6133        | Level 1        | {L_tG7}{P_MAS}{C_UGE2}{T_AtAct2}                                                                                                 |
| pms6134        | Level 1        | {L_AtAct2}{P_AtAct2}{C_URGT1}{T_tNos}                                                                                            |
| <b>C2</b>      | <b>Level 2</b> | <b>{L_tOcs}{P_AtC4H}{C_GALS1}{T_tG7}{P_AtIRX5}{C_UGE2}{T_AtAct2}{P_AtIRX8}{C_URGT1}{T_tNos}</b>                                  |
| pms6135        | Level 1        | {L_tOcs}{P_AtC4H}{C_GALS1}{T_tG7}                                                                                                |
| pms6136        | Level 1        | {L_tG7}{P_AtIRX5}{C_UGE2}{T_AtAct2}                                                                                              |
| pms6137        | Level 1        | {L_AtAct2}{P_AtIRX8}{C_URGT1}{T_tNos}                                                                                            |
| <b>C3</b>      | <b>Level 2</b> | <b>{L_tOcs}{P_AtC4H}{C_GALS1}{T_tG7}{P_AtIRX5}{C_NST-2A-UGE2}{T_AtAct2}{P_AtIRX8}{C_URGT1}{T_tNos}</b>                           |
| pms6135        | Level 1        | {L_tOcs}{P_AtC4H}{C_GALS1}{T_tG7}                                                                                                |
| pms6138        | Level 1        | {L_tG7}{P_AtIRX5}{C_NST-2A-UGE2}{T_AtAct2}                                                                                       |
| pms6137        | Level 1        | {L_AtAct2}{P_AtIRX8}{C_URGT1}{T_tNos}                                                                                            |
| <b>C4</b>      | <b>Level 2</b> | <b>{L_tOcs}{P_AtC4H}{C_GALS1}{T_tG7}{P_AtIRX5}{C_UGE2}{T_AtAct2}{P_AtIRX8}{C_URGT1}{T_MAS}{P_ArCesA7}{C_QsuB}{T_tNos}</b>        |
| pms6135        | Level 1        | {L_tOcs}{P_AtC4H}{C_GALS1}{T_tG7}                                                                                                |
| pms6136        | Level 1        | {L_tG7}{P_AtIRX5}{C_UGE2}{T_AtAct2}                                                                                              |
| pms6139        | Level 1        | {L_AtAct2}{P_AtIRX8}{C_URGT1}{T_MAS}                                                                                             |
| pms6140        | Level 1        | {L_MAS}{P_ArCesA7}{C_QsuB}{T_tNos}                                                                                               |
| <b>C5</b>      | <b>Level 2</b> | <b>{L_tOcs}{P_AtC4H}{C_GALS1}{T_tG7}{P_AtIRX5}{C_NST-2A-UGE2}{T_AtAct2}{P_AtIRX8}{C_URGT1}{T_MAS}{P_ArCesA7}{C_QsuB}{T_tNos}</b> |
| pms6135        | Level 1        | {L_tOcs}{P_AtC4H}{C_GALS1}{T_tG7}                                                                                                |
| pms6138        | Level 1        | {L_tG7}{P_AtIRX5}{C_NST-2A-UGE2}{T_AtAct2}                                                                                       |
| pms6139        | Level 1        | {L_AtAct2}{P_AtIRX8}{C_URGT1}{T_MAS}                                                                                             |
| pms6140        | Level 1        | {L_MAS}{P_ArCesA7}{C_QsuB}{T_tNos}                                                                                               |

## Additional file 4: Summary of jStack constructs.
